# Supplementary material for: Syntheses and crystal structures of dinuclear, trinuclear [2 × 1 + 1 × 1] and tetranuclear [2 × 1 + 1 × 2] copper(ii)–d10complexes (d10⇒ ZnII, CdII, HgIIand AgI) derived from N,N′-ethylenebis(3-ethoxysalicylaldimine)
Source: Royal Society of Chemistry journal article supplement (doi:10.1039/c0ce00158a), 2010-09-06
Supplement: c0ce00158a.pdf [file c0ce00158a.pdf]

## Electronic Supplementary Information

For

**Syntheses and crystal structures of dinuclear, trinuclear [2×1+1×1] and tetranuclear [2×1+1×2] copper(II)-d<sup>10</sup> complexes (d<sup>10</sup> ⇒ Zn<sup>II</sup>, Cd<sup>II</sup>, Hg<sup>II</sup> and Ag<sup>I</sup>) derived from *N,N'*-ethylenebis(3-ethoxysalicylaldimine)**

**Malabika Nayak,<sup>a</sup> Sohini Sarkar,<sup>a</sup> Susanta Hazra,<sup>a</sup> Hazel A. Sparkes,<sup>b</sup> Judith A. K. Howard<sup>b</sup> and Sasankasekhar Mohanta\*<sup>a</sup>**

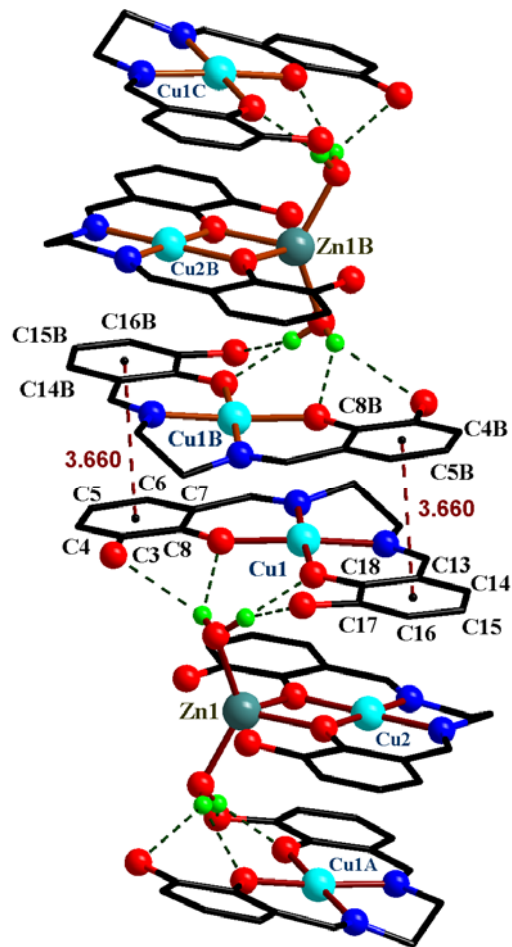

**Fig. S1** Perspective view of **1** demonstrating the one-dimensional polymeric self-assembly resulted due to  $\pi$ - $\pi$  stacking interactions. Hydrogen atoms, except those of water molecules, are omitted. The perchlorate anions and the ethoxy carbon atoms are also not shown for clarity. Symmetry code: A,  $-x, y, 0.5-z$ ; B,  $-x, -y, 1-z$ ; C,  $x, -y, 0.5+z$ .

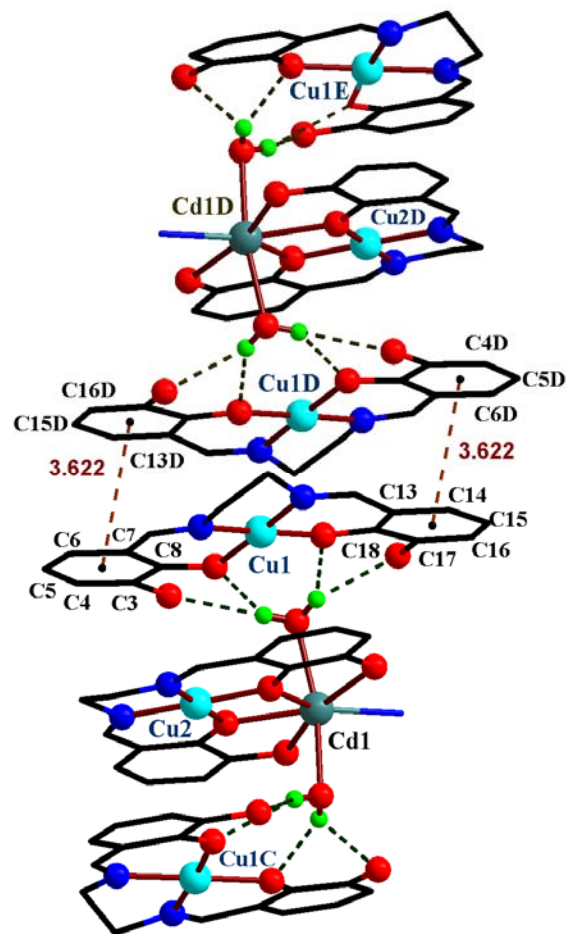

**Fig. S2** Perspective view of **2** demonstrating the one-dimensional polymeric self-assembly resulted due to  $\pi$ - $\pi$  stacking interactions. Hydrogen atoms, except those of water molecules, are omitted. The perchlorate anions and the ethoxy carbon atoms are also not shown for clarity. Symmetry code: C,  $-x, y, 1.5-z$ ; D,  $0.5-x, 1.5-y, 2-z$ ; E,  $0.5+x, 1.5-y, 0.5+z$ .
